# Supplementary material for: Impact of bronchoalveolar lavage lymphocytosis on the effects of anti-inflammatory therapy in idiopathic non-specific interstitial pneumonia, idiopathic pleuroparenchymal fibroelastosis, and unclassifiable idiopathic interstitial pneumonia
Source: PubMed Central journal article supplement (PMC8059166; doi:10.1186/s12931-021-01726-8), 2021-04-20

A)

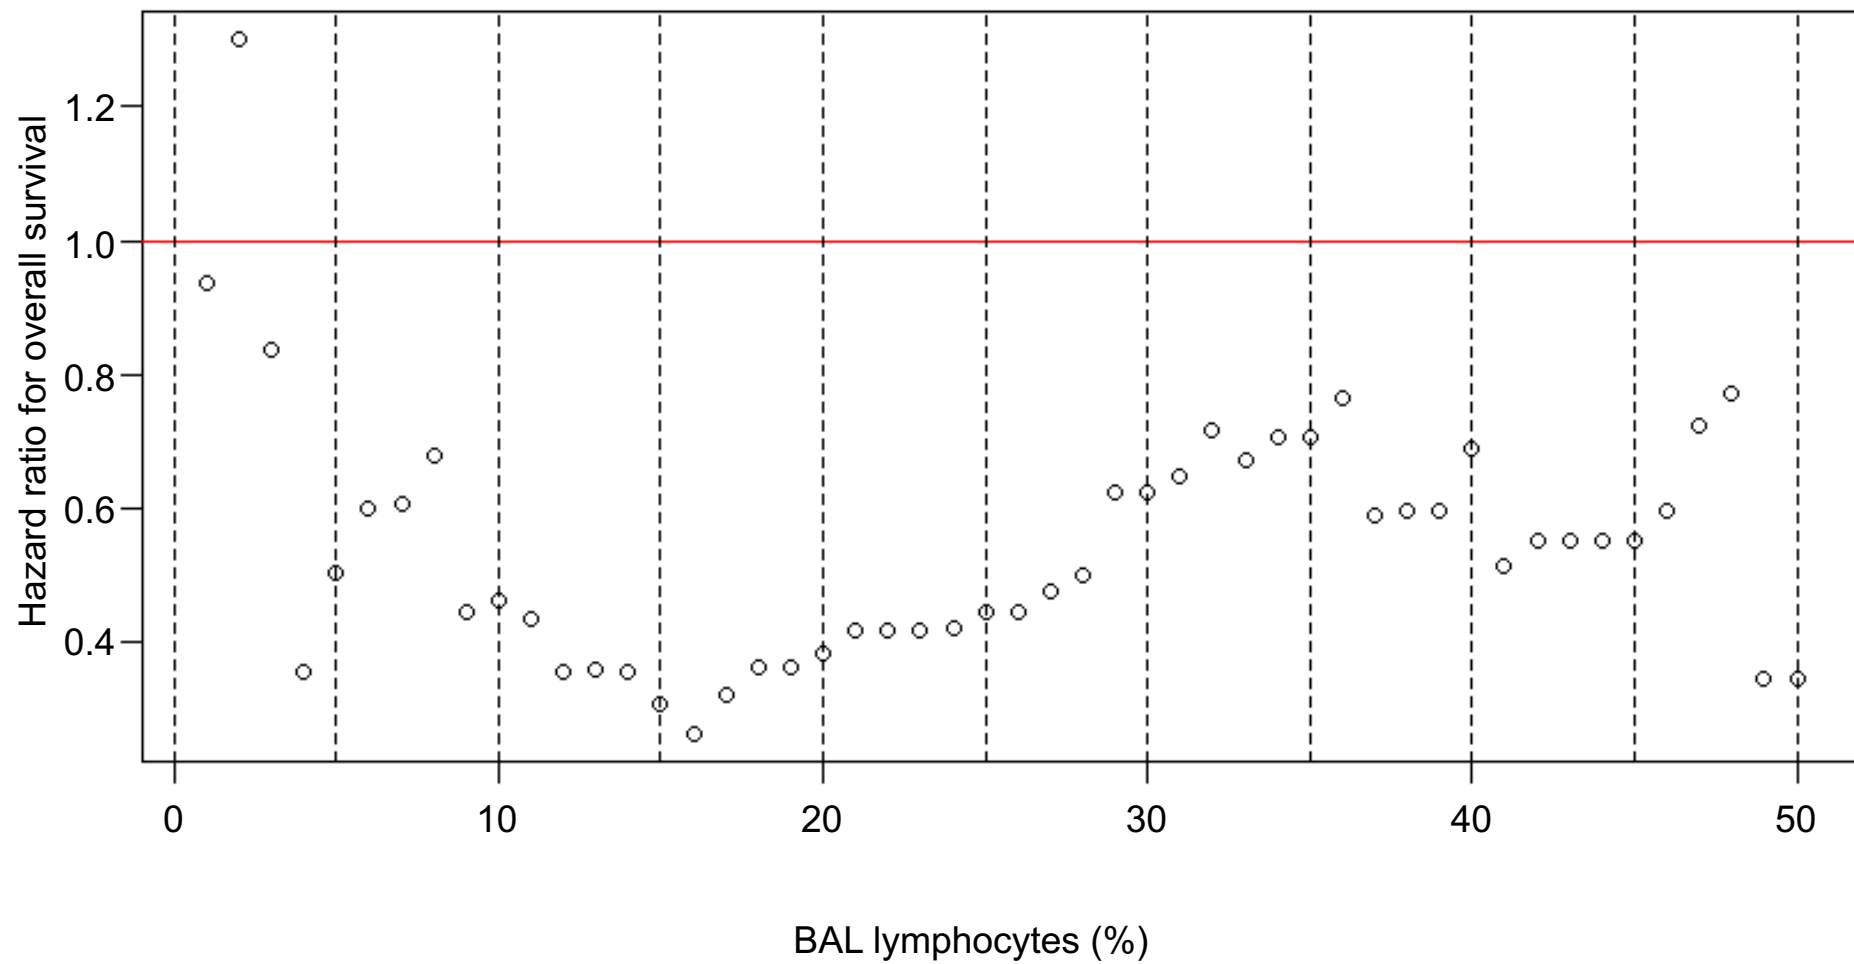

B)

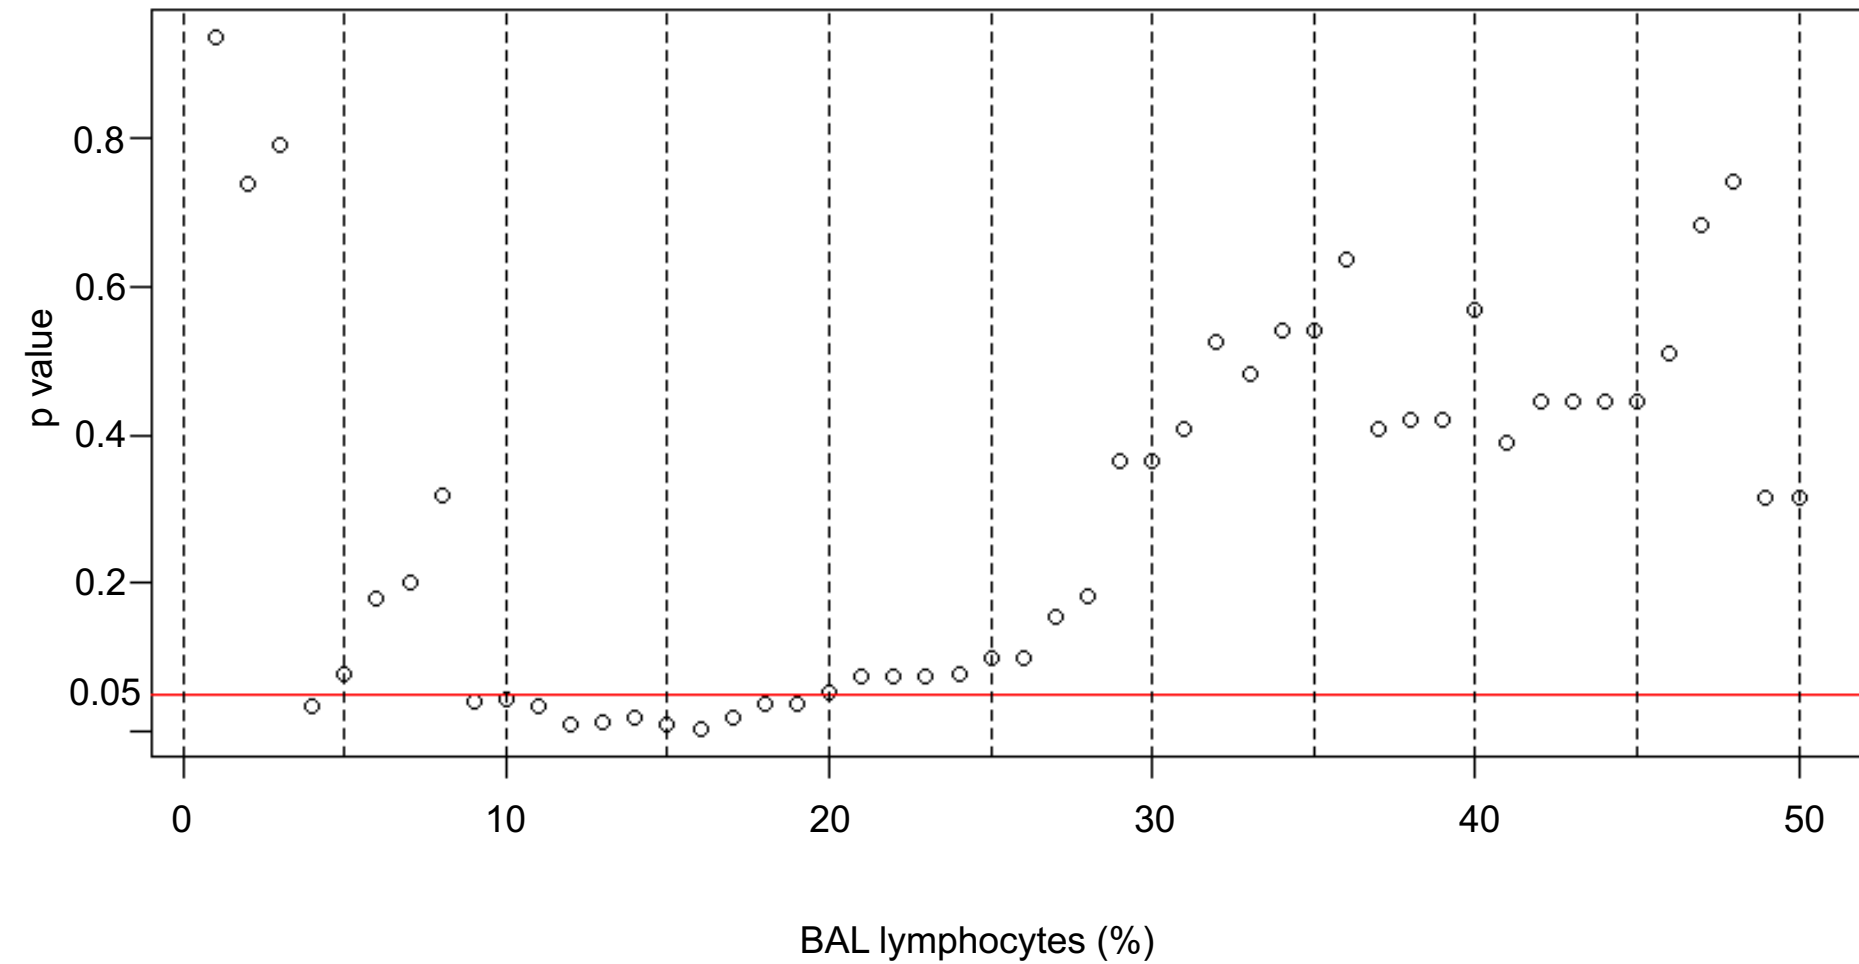

Supplement: 12931_2021_1726_MOESM4_ESM.pdf [file 12931_2021_1726_MOESM4_ESM.pdf]
